# Supplementary material
Source: PubMed Central journal article supplement (PMC2151405)
Supplement: hesr0042-2089-s1.pdf [file hesr0042-2089-s1.pdf]

Effect of Critical Access Hospital Conversion on Patient Safety: Appendix

Table S1. Weights for Composite PSI Score

| PSI    | Weighted by numerator of each PSI |                                      |                                      | Weighted by denominator of each PSI |                                      |                                      |
|--------|-----------------------------------|--------------------------------------|--------------------------------------|-------------------------------------|--------------------------------------|--------------------------------------|
|        | Frequency <sup>†</sup>            | Weights for composite score of 6PSIs | Weights for composite score of 4PSIs | Frequency <sup>+</sup>              | Weights for composite score of 6PSIs | Weights for composite score of 4PSIs |
| PSI-2  | 107                               | 3.77%                                | 0                                    | 142,621                             | 6.64%                                | 0                                    |
| PSI-3  | 1,493                             | 52.66%                               | 0                                    | 116,346                             | 5.42%                                | 0                                    |
| PSI-5  | 26                                | 0.92%                                | 2.11%                                | 552,130                             | 25.70%                               | 29.23%                               |
| PSI-6  | 122                               | 4.30%                                | 9.88%                                | 472,447                             | 21.99%                               | 25.01%                               |
| PSI-7  | 203                               | 7.16%                                | 16.44%                               | 377,362                             | 17.57%                               | 19.97%                               |
| PSI-15 | 884                               | 31.18%                               | 71.58%                               | 487,234                             | 22.68%                               | 25.79%                               |

† Total frequencies of numerator for each PSI among 89 Iowa rural hospitals from 1997 to 2004

+ Total frequencies of denominator for each PSI among 89 Iowa rural hospitals from 1997 to 2004
