# Supplementary material
Source: PubMed Central journal article supplement (PMC2151405)
Supplement: hesr0042-2089-s2.pdf [file hesr0042-2089-s2.pdf]

Effect of Critical Access Hospital Conversion on Patient Safety: Appendix

Table S2. Median for Continuous PSIs, Frequency and Percentage for Binary PSIs

| PSIs                                               | Total observations | Median | Frequency and percentage of the observations with value higher than median within each group (Binary PSI: bad performance=1) |            |           |            |           |            |
|----------------------------------------------------|--------------------|--------|------------------------------------------------------------------------------------------------------------------------------|------------|-----------|------------|-----------|------------|
|                                                    |                    |        | All hospitals                                                                                                                |            | Rural PPS |            | CAH       |            |
|                                                    |                    |        | Frequency                                                                                                                    | Percentage | Frequency | Percentage | Frequency | Percentage |
| PSI-2                                              | 630                | 0.00   | 62                                                                                                                           | 9.84%      | 49        | 10.47%     | 13        | 8.02%      |
| PSI-3                                              | 624                | 7.47   | 312                                                                                                                          | 50.00%     | 243       | 51.48%     | 69        | 45.39%     |
| PSI-5                                              | 712                | 0.00   | 25                                                                                                                           | 3.51%      | 20        | 3.98%      | 5         | 2.39%      |
| PSI-6                                              | 712                | 0.00   | 92                                                                                                                           | 12.92%     | 82        | 16.30%**   | 10        | 4.78%**    |
| PSI-7                                              | 712                | 0.00   | 136                                                                                                                          | 19.10%     | 119       | 23.66%**   | 17        | 8.13%**    |
| PSI-15                                             | 712                | 0.00   | 323                                                                                                                          | 45.37%     | 272       | 54.08%**   | 51        | 24.40%**   |
| Composite score of 4PSIs (weighted by numerator)   | 712                | 0.42   | 356                                                                                                                          | 50.00%     | 293       | 58.25%**   | 63        | 30.14%**   |
| Composite score of 6PSIs (weighted by numerator)   | 594                | 4.78   | 297                                                                                                                          | 50.00%     | 239       | 52.64%**   | 58        | 41.43%**   |
| Composite score of 4PSIs (weighted by denominator) | 712                | 0.44   | 356                                                                                                                          | 50.00%     | 288       | 57.26%**   | 68        | 32.54%**   |
| Composite score of 6PSIs (weighted by denominator) | 594                | 1.12   | 297                                                                                                                          | 50.00%     | 242       | 53.30%**   | 55        | 39.29%**   |

\*\* Percentages of bad performance between CAH and rural PPS hospitals are significantly different (Chi-square test)
