# Supplementary material
Source: PubMed Central journal article supplement (PMC2151405)
Supplement: hesr0042-2089-s3.pdf [file hesr0042-2089-s3.pdf]

Effect of Critical Access Hospital Conversion on Patient Safety: Appendix

Table S3. GEE Logit Models of the Performance of PSIs (1=bad performance, 0=good performance) in Iowa Rural Hospitals (Composite Scores Weighted by Denominators), 1997-2004<sup>+</sup>

|                             | Composite score of 4PSIs |         | Composite score of 6PSIs |         |
|-----------------------------|--------------------------|---------|--------------------------|---------|
|                             | A                        | B       | A                        | B       |
| CAH/CAHmv                   | -0.55**                  | -0.78** | -0.42                    | -0.67   |
| % Medicare days             | -0.01                    | -0.01   | 0.00                     | 0.00    |
| % Medicaid days             | 0.02                     | 0.02    | 0.01                     | 0.00    |
| % of surgical discharges    | 0.13**                   | 0.13**  | 0.09**                   | 0.08**  |
| Charlson Index              | 1.37**                   | 1.35**  | 2.79**                   | 2.80**  |
| Market concentration (HHI)  | -0.29                    | -0.29   | -0.40                    | -0.40   |
| Per capita income (\$1,000) | 0.06                     | 0.05    | 0.11**                   | 0.11**  |
| Population density          | 0.00                     | 0.00    | 0.00                     | 0.00    |
| y1998                       | -0.42                    | -0.42   | -0.18                    | -0.18   |
| y1999                       | -0.18                    | -0.19   | -0.19                    | -0.19   |
| y2000                       | -0.12                    | -0.16   | -0.01                    | -0.03   |
| y2001                       | 0.21                     | 0.13    | 0.10                     | 0.06    |
| y2002                       | -0.30                    | -0.33   | -0.15                    | -0.16   |
| y2003                       | 0.00                     | 0.04    | 0.37                     | 0.40    |
| y2004                       | -0.61                    | -0.55   | -0.36                    | -0.30   |
| Intercept                   | -2.32                    | -2.27   | -5.28**                  | -5.26** |
| observations                | 712                      | 712     | 594                      | 594     |

+ Unit of analysis is hospital per year. Y1998 to y2004 were dummy variable for year 1998 to 2004. The year of 1997 is the reference category.

\* Statistically significant at 0.10 level.

\*\*Statistically significant at 0.05 level.

A. model using CAH; B. model using CAH moving average
