# Supplementary material
Source: PubMed Central journal article supplement (PMC2151405)
Supplement: hesr0042-2089-s4.pdf [file hesr0042-2089-s4.pdf]

Effect of Critical Access Hospital Conversion on Patient Safety: Appendix

Table S4. Sensitivity Analyses of GEE Logit Models of Binary PSIs (1=bad performance, 0=good performance): Coefficients of CAH, and CAHmv<sup>+</sup>

| Models                                                                                  |                  | PSI-2  | PSI-3 | PSI-5 | PSI-6   | PSI-7   | PSI-15  | Composite score of 4PSIs | Composite score of 6PSIs |
|-----------------------------------------------------------------------------------------|------------------|--------|-------|-------|---------|---------|---------|--------------------------|--------------------------|
| Models using the whole sample (89 hospitals, 1997 to 2004)                              | CAH <sup>‡</sup> | -0.54  | -0.24 | -0.80 | -1.19** | -1.26** | -0.92** | -0.70**                  | -0.30                    |
|                                                                                         | CAHmv            | -0.58  | -0.60 | -0.67 | -1.57** | -2.05** | -1.37** | -1.03**                  | -0.59                    |
| Models excluding 8 hospitals which is in rural PPS in 2006 (81 hospitals, 1997 to 2004) | CAH              | -0.61  | -0.19 | -0.94 | -1.11** | -1.41** | -0.85** | -0.63**                  | -0.31                    |
|                                                                                         | CAHmv            | -0.97* | -0.57 | -0.79 | -1.45** | -2.28** | -1.27** | -0.94**                  | -0.66                    |
| Models adding hospital bed size and discharge (89 hospitals, 1997 to 2004)              | CAH              | 0.06   | -0.04 | -0.59 | -0.57   | -0.74*  | -0.34   | -0.19                    | -0.21                    |
|                                                                                         | CAHmv            | -0.06  | -0.33 | -0.38 | -0.64   | -1.23** | -0.49   | -0.28                    | -0.44                    |

\* Statistically significant at 0.1 level.

\*\* Statistically significant at 0.05 level.

+ Unit of analysis is hospital-year. Y1998 to y2004 were dummy variable for year 1998 to 2004. The year of 1997 is the reference category. Coefficients based on GEE logit models with the following control variables: CAH/CAHmv, % Medicare days, % Medicaid days, % of surgical discharges, Charlson Index, Market concentration (HHI), Per capita income (\$1,000), Population density, and year dummy variables.

‡ The same as the models of Table 4. in the manuscript
