# Supplementary material
Source: PubMed Central journal article supplement (PMC2151405)
Supplement: hesr0042-2089-s6.pdf [file hesr0042-2089-s6.pdf]

Effect of Critical Access Hospital Conversion on Patient Safety: Appendix

Table S6. Random-Effects Tobit model Simulation of the Impact of CAH conversion on the Risk-adjusted Composite PSIs<sup>†</sup>

|                                                                                                   | Composite score of 4PSIs (obs=712) | Composite score of 6PSIs (obs=594) |
|---------------------------------------------------------------------------------------------------|------------------------------------|------------------------------------|
| Coefficients                                                                                      | -1.000                             | -0.840                             |
| Mean of predicted values if all hospitals in rural PPS status (P_PPS)                             | 0.802                              | 5.385                              |
| Mean of predicted values if all hospitals in CAH (P_CAH)                                          | 0.319                              | 4.548                              |
| magnitude of the impact of CAH conversion on the composite PSIs:<br>((P_CAH- P_PPS )/ P_PPS)*100% | -60%                               | -16%                               |

<sup>†</sup> The simulation was conducted based on the following steps. First, we ran random-effects Tobit models. Second we coded all hospitals as rural PPS, predict the composite PSI rates and compute the means of predicted composite PSI rates (P\_PPS). Then we coded all hospitals as CAH, predict the composite PSI rates and compute the means of predicted composite PSI rates (P\_CAH). The magnitude of the impact of CAH conversion on the composite PSIs is ((P\_CAH- P\_PPS )/ P\_PPS)\*100%
