# Supplementary material
Source: PubMed Central journal article supplement (PMC2151405)
Supplement: hesr0042-2089-s7.pdf [file hesr0042-2089-s7.pdf]

Effect of Critical Access Hospital Conversion on Patient Safety: Appendix

Table S7. Fixed-effects Panel Data Models<sup>+</sup> of CAH Conversion on Hospital Bed Size and Discharges

| Regression parameters | Hospital discharges |                 | Hospital bed size |                 |
|-----------------------|---------------------|-----------------|-------------------|-----------------|
|                       | Coefficient         | Standard. Error | Coefficient       | Standard. Error |
| CAH                   | -66.75**            | 20.26           | -4.62**           | 0.82            |
| y1998                 | -2.06               | 22.46           | -0.29             | 0.91            |
| y1999                 | -14.22              | 22.46           | -1.96**           | 0.91            |
| y2000                 | 2.86                | 22.59           | -0.64             | 0.92            |
| y2001                 | 118.58**            | 23.61           | -1.52             | 0.96            |
| y2002                 | -22.25              | 24.59           | -2.82**           | 1.00            |
| y2003                 | -22.56              | 25.71           | -3.45**           | 1.05            |
| y2004                 | -52.33*             | 27.02           | -3.86**           | 1.10            |
| Intercept             | 919.72**            | 15.88           | 37.49**           | 0.65            |
| Observations          | 712                 |                 | 712               |                 |
| Groups                | 89                  |                 | 89                |                 |
| R-squared-within      | 0.15                |                 | 0.21              |                 |
| F statistic (8, 615)  | 13.22**             |                 | 20.09**           |                 |

\* Statistically significant at 0.1 level.

\*\*Statistically significant at 0.05 level.

+ Difference from mean least squares models were used in fixed-effects panel data models (Woolridge 2002). Y1998 to y2004 were dummy variable for year 1998 to 2004. The dummy variable for 1997 was omitted as the reference category.
