# Supplementary material
Source: PubMed Central journal article supplement (PMC2151405)
Supplement: hesr0042-2089-s8.pdf [file hesr0042-2089-s8.pdf]

Effect of Critical Access Hospital Conversion on Patient Safety: Appendix

Table S8. Fixed-effects Panel Data Models<sup>+</sup> of CAH Conversion on Hospital Inpatient Case-mix

| Regression parameters | Hospital-level average number of diagnosis |                 | Hospital-level average number of Elixhauser comorbidities |                 | Hospital-level mean Charlson score |                 |
|-----------------------|--------------------------------------------|-----------------|-----------------------------------------------------------|-----------------|------------------------------------|-----------------|
|                       | Coefficient                                | Standard. Error | Coefficient                                               | Standard. Error | Coefficient                        | Standard. Error |
| CAH                   | 0.0149                                     | 0.0627          | 0.0081                                                    | 0.0198          | 0.0073                             | 0.0144          |
| y1998                 | 0.0279                                     | 0.0695          | 0.0343                                                    | 0.0219          | -0.0150                            | 0.0160          |
| y1999                 | 0.1355*                                    | 0.0695          | 0.0850**                                                  | 0.0219          | 0.0154                             | 0.0160          |
| y2000                 | 0.1998**                                   | 0.0699          | 0.0925**                                                  | 0.0220          | 0.0076                             | 0.0161          |
| y2001                 | 0.4767**                                   | 0.0730          | 0.1927**                                                  | 0.0230          | 0.0707**                           | 0.0168          |
| y2002                 | 0.3878**                                   | 0.0761          | 0.1678**                                                  | 0.0240          | 0.0061                             | 0.0175          |
| y2003                 | 0.3821**                                   | 0.0795          | 0.1761**                                                  | 0.0251          | 0.0010                             | 0.0183          |
| y2004                 | 0.5827**                                   | 0.0836          | 0.2301**                                                  | 0.0264          | -0.0047                            | 0.0192          |
| Intercept             | 4.8074**                                   | 0.0491          | 1.1990**                                                  | 0.0155          | 0.7953                             | 0.0113          |
| Observations          | 712                                        |                 | 712                                                       |                 | 712                                |                 |
| Groups                | 89                                         |                 | 89                                                        |                 | 89                                 |                 |
| R-squared-within      | 0.1837                                     |                 | 0.2497                                                    |                 | 0.0585                             |                 |
| F statistic (8, 615)  | 17.3**                                     |                 | 25.58**                                                   |                 | 4.78**                             |                 |

\* Statistically significant at 0.1 level.

\*\*Statistically significant at 0.05 level.

+ Difference from mean least squares models were used in fixed-effects panel data models (Woolridge 2002). Y1998 to y2004 were dummy variable for year 1998 to 2004. The dummy variable for 1997 was omitted as the reference category.
