# Supplementary material
Source: PubMed Central journal article supplement (PMC2151405)
Supplement: hesr0042-2089-s9.pdf [file hesr0042-2089-s9.pdf]

Effect of Critical Access Hospital Conversion on Patient Safety: Appendix

Table S9. National Trends for PSI-2, PSI-3, PSI-5, PSI-6, PSI-7, and PSI-15

| Year | PSI-2 | PSI-3  | PSI-5 | PSI-6 | PSI-7 | PSI-15 |
|------|-------|--------|-------|-------|-------|--------|
| 1997 | 0.728 | 19.939 | 0.728 | 1.227 | 1.833 | 2.721  |
| 2000 | 0.748 | 21.724 | 0.748 | 0.833 | 2.041 | 3.272  |
| 2001 | 0.747 | 22.838 | 0.747 | 0.827 | 2.114 | 3.493  |
| 2002 | 0.875 | 23.289 | 0.875 | 0.886 | 2.275 | 3.790  |
| 2003 | 1.184 | 24.445 | 1.184 | 0.848 | 2.270 | 3.758  |

Note: Lower PSI value is better performance

Source: AHRQ (2006) National information on measures of health care quality based on the NIS, using the AHRQ Quality Indicators (QIs)
