# Supplementary material
Source: PubMed Central journal article supplement (PMC2151405)
Supplement: hesr0042-2089-s10.pdf [file hesr0042-2089-s10.pdf]

Effect of Critical Access Hospital Conversion on Patient Safety: Appendix

Table S10. Trend for PSI-2, PSI-3, PSI-5, PSI-6, PSI-7, and PSI-15 among Other Iowa Hospitals (Urban Hospitals and Rural Referral Hospitals)

| Year | Number of Hospitals | PSI-2 | PSI-3  | PSI-5 | PSI-6 | PSI-7 | PSI-15 |
|------|---------------------|-------|--------|-------|-------|-------|--------|
| 1997 | 27                  | 0.476 | 13.389 | 0.062 | 0.790 | 1.898 | 2.858  |
| 1998 | 27                  | 0.929 | 12.796 | 0.110 | 0.564 | 1.668 | 2.907  |
| 1999 | 27                  | 0.000 | 13.044 | 0.100 | 0.650 | 1.677 | 2.990  |
| 2000 | 27                  | 0.000 | 14.131 | 0.097 | 0.593 | 1.479 | 3.311  |
| 2001 | 27                  | 0.477 | 12.910 | 0.084 | 0.638 | 1.713 | 3.458  |
| 2002 | 26                  | 0.713 | 12.749 | 0.091 | 0.747 | 1.462 | 3.459  |
| 2003 | 26                  | 0.920 | 12.304 | 0.084 | 0.647 | 1.468 | 3.118  |
| 2004 | 26                  | 0.991 | 11.919 | 0.083 | 0.628 | 1.379 | 3.874  |

Note: Computed based on Iowa SIDs 1997-2004 using AHRQ PSI software. Lower PSI value is better performance
