# Supplementary material
Source: PubMed Central journal article supplement (PMC2151405)
Supplement: hesr0042-2089-s11.pdf [file hesr0042-2089-s11.pdf]

Effect of Critical Access Hospital Conversion on Patient Safety: Appendix

Table S11. Quadchk Results for PSI-2 and PSI-5:

Relative Difference<sup>+</sup> of Coefficients in 8 or 16 Quadrature Points Compared with Original Coefficients<sup>†</sup>

|                             | PSI-2           |           |                 |           | PSI-5           |           |                 |           |
|-----------------------------|-----------------|-----------|-----------------|-----------|-----------------|-----------|-----------------|-----------|
|                             | Model using CAH |           | Model using CAH |           | Model using CAH |           | Model using CAH |           |
|                             | 8 points        | 16 points |
| Log Likelihood              | 0               | -1.39E-15 | 5.95E-16        | -7.94E-16 | 3.10E-12        | 3.10E-12  | 3.10E-12        | 3.10E-12  |
| CAH/CAHmv                   | 8.44E-16        | 8.44E-16  | -5.07E-16       | -7.60E-16 | 2.38E-11        | 2.38E-11  | 2.38E-11        | 2.38E-11  |
| % Medicare days             | 1.92E-15        | 1.71E-15  | -3.17E-15       | -3.38E-15 | 2.38E-11        | 2.38E-11  | 2.38E-11        | 2.38E-11  |
| % Medicaid days             | 3.21E-15        | 2.83E-15  | -2.72E-15       | -3.88E-15 | -2.52E-11       | -2.52E-11 | -2.52E-11       | -2.52E-11 |
| % of surgical discharges    | -3.13E-15       | -4.13E-15 | 1.04E-14        | 7.51E-15  | 1.80E-11        | 1.80E-11  | 1.80E-11        | 1.80E-11  |
| Charlson Index              | 9.37E-16        | 3.75E-16  | -1.83E-15       | -1.83E-15 | 1.82E-11        | 1.82E-11  | 1.82E-11        | 1.82E-11  |
| Market concentration (HHI)  | 1.01E-14        | 3.51E-15  | 2.60E-15        | 8.22E-15  | 1.53E-11        | 1.53E-11  | 1.53E-11        | 1.53E-11  |
| Per capita income (\$1,000) | 8.00E-16        | 1.40E-15  | -5.98E-16       | -3.39E-15 | 7.17E-12        | 7.17E-12  | 7.17E-12        | 7.17E-12  |
| Population density          | 2.58E-15        | 1.36E-15  | -2.17E-15       | 1.24E-15  | 2.09E-11        | 2.09E-11  | 2.09E-11        | 2.09E-11  |
| y1998                       | 2.58E-15        | 2.58E-15  | -2.78E-15       | -2.23E-15 | 3.76E-11        | 3.76E-11  | 3.76E-11        | 3.76E-11  |
| y1999                       | 0.049992        | 0.033571  | 0.033581        | 0.173835  | 1.64E-11        | 1.64E-11  | 1.64E-11        | 1.64E-11  |
| y2000                       | 0.049945        | 0.033548  | 0.033583        | 0.173723  | 2.76E-11        | 2.76E-11  | 2.76E-11        | 2.76E-11  |
| y2001                       | 2.49E-15        | 2.15E-15  | -2.17E-15       | 2.71E-16  | 1.50E-11        | 1.50E-11  | 1.50E-11        | 1.50E-11  |
| y2002                       | 3.15E-15        | 2.40E-15  | -5.34E-15       | -3.01E-15 | 1.08E-11        | 1.08E-11  | 1.08E-11        | 1.08E-11  |
| y2003                       | 3.69E-15        | 2.58E-15  | -2.84E-15       | -7.74E-16 | 3.46E-11        | 3.46E-11  | 3.46E-11        | 3.46E-11  |
| y2004                       | 3.98E-15        | 4.44E-15  | -4.76E-15       | -7.00E-16 | 1.55E-11        | 1.55E-11  | 1.55E-11        | 1.55E-11  |
| Intercept                   | 1.76E-15        | 1.94E-15  | -2.30E-15       | -3.00E-15 | 1.88E-11        | 1.88E-11  | 1.88E-11        | 1.88E-11  |

+ Relative difference=(coefficient in 8 or 16 quadrature points- original coefficient)/ original coefficients

† In 12 quadrature points

Effect of Critical Access Hospital Conversion on Patient Safety: Appendix

Table S12. Quadchk Results for PSI-3:

Relative Difference<sup>+</sup> of Coefficients in 8 or 16 Quadrature Points Compared with Original Coefficients<sup>†</sup>

|                             | Risk-adjusted rate |           |                   |           | Observed rate   |           |                   |           |
|-----------------------------|--------------------|-----------|-------------------|-----------|-----------------|-----------|-------------------|-----------|
|                             | Model using CAH    |           | Model using CAHmv |           | Model using CAH |           | Model using CAHmv |           |
|                             | 8 points           | 16 points | 8 points          | 16 points | 8 points        | 16 points | 8 points          | 16 points |
| Log Likelihood              | -0.00024           | 2.25E-05  | -0.00026          | 2.39E-05  | -6.6E-05        | 1.26E-06  | -7.3E-05          | 2.22E-06  |
| CAH/CAHmv                   | -0.01971           | 0.003271  | -0.00978          | 0.001276  | -0.03382        | 0.004424  | -0.01716          | 0.002162  |
| % Medicare days             | 0.004824           | 0.005627  | 0.008113          | 0.004656  | -0.01642        | 0.000975  | -0.01121          | 0.000635  |
| % Medicaid days             | 0.001918           | 0.00248   | 0.006449          | 0.00161   | -0.0157         | -0.00054  | -0.01446          | -0.00083  |
| % of surgical discharges    | 0.155261           | -0.02083  | 0.335955          | -0.0418   | 0.021725        | -0.00236  | 0.059628          | -0.00687  |
| Charlson Index              | 0.004373           | -0.00152  | 0.002482          | -0.00148  | -0.00786        | 0.000159  | -0.00538          | -4.7E-05  |
| Market concentration (HHI)  | -0.00994           | 0.013447  | -0.00162          | 0.007854  | 0.038312        | 0.004791  | 0.04075           | 0.004197  |
| Per capita income (\$1,000) | -0.00518           | 0.001915  | -0.00666          | 0.002033  | -0.00535        | -0.00014  | -0.00623          | -6.5E-05  |
| Population density          | -0.04392           | 0.013733  | -0.04582          | 0.0122    | -0.10122        | 0.006297  | -0.10464          | 0.007027  |
| y1998                       | 0.001306           | -0.00049  | 0.002109          | -0.00058  | -0.00016        | 2.75E-05  | 7.64E-05          | 6.71E-07  |
| y1999                       | 0.002462           | -0.00054  | 0.003178          | -0.00063  | 0.00031         | -1.4E-05  | 0.000492          | -3.7E-05  |
| y2000                       | 0.005311           | -0.00121  | 0.006989          | -0.00142  | 0.000873        | 0.000105  | 0.001721          | -1.22E-06 |
| y2001                       | 0.002294           | -0.00053  | 0.004807          | -0.00089  | -4.67E-06       | 0.000106  | 0.000605          | 4.73E-06  |
| y2002                       | -0.00119           | -0.00129  | 0.004572          | -0.00198  | -0.03479        | 0.008696  | -0.01022          | 0.002829  |
| y2003                       | 0.00092            | -0.00135  | 0.004771          | -0.00164  | -0.00217        | 0.000827  | -0.002            | 0.000691  |
| y2004                       | 0.000765           | -0.00037  | 0.001997          | -0.00061  | -0.00359        | 0.001009  | -0.00356          | 0.000852  |
| Intercept                   | 0.000537           | 0.000373  | -0.00084          | 0.000772  | -0.01337        | -0.0011   | -0.01356          | -0.00109  |

+ Relative difference=(coefficient in 8 or 16 quadrature points- original coefficient)/ original coefficients

† In 12 quadrature points

Effect of Critical Access Hospital Conversion on Patient Safety: Appendix

Table S13. Quadchk Results for PSI-6:

Relative Difference<sup>+</sup> of Coefficients in 8 or 16 Quadrature Points Compared with Original Coefficients<sup>†</sup>

|                             | Risk-adjusted rate |           |                   |           | Observed rate   |           |                   |           |
|-----------------------------|--------------------|-----------|-------------------|-----------|-----------------|-----------|-------------------|-----------|
|                             | Model using CAH    |           | Model using CAHmv |           | Model using CAH |           | Model using CAHmv |           |
|                             | 8 points           | 16 points | 8 points          | 16 points | 8 points        | 16 points | 8 points          | 16 points |
| Log Likelihood              | 2.29E-13           | 2.28E-13  | 2.12E-13          | 2.11E-13  | 2.53E-13        | 2.52E-13  | 2.29E-13          | 2.29E-13  |
| CAH/CAHmv                   | 2.63E-12           | 2.63E-12  | 2.63E-12          | 2.63E-12  | 3.36E-12        | 3.36E-12  | 3.24E-12          | 3.25E-12  |
| % Medicare days             | 2.61E-12           | 2.60E-12  | 2.44E-12          | 2.43E-12  | 2.85E-12        | 2.85E-12  | 2.59E-12          | 2.59E-12  |
| % Medicaid days             | 3.08E-12           | 3.08E-12  | 2.71E-12          | 2.71E-12  | 3.22E-12        | 3.22E-12  | 2.83E-12          | 2.83E-12  |
| % of surgical discharges    | 2.36E-12           | 2.36E-12  | 2.15E-12          | 2.15E-12  | 2.63E-12        | 2.63E-12  | 2.39E-12          | 2.39E-12  |
| Charlson Index              | 3.54E-12           | 3.54E-12  | 3.33E-12          | 3.33E-12  | 2.97E-12        | 2.97E-12  | 2.67E-12          | 2.67E-12  |
| Market concentration (HHI)  | 1.53E-12           | 1.53E-12  | 1.44E-12          | 1.45E-12  | 1.90E-12        | 1.90E-12  | 1.77E-12          | 1.78E-12  |
| Per capita income (\$1,000) | -2.34E-11          | -2.33E-11 | 1.79E-10          | 1.78E-10  | 3.05E-10        | 3.01E-10  | 2.64E-11          | 2.65E-11  |
| Population density          | 2.53E-12           | 2.53E-12  | 2.32E-12          | 2.32E-12  | 3.07E-12        | 3.07E-12  | 2.76E-12          | 2.76E-12  |
| y1998                       | 1.49E-12           | 1.49E-12  | 1.37E-12          | 1.37E-12  | 1.81E-12        | 1.81E-12  | 1.64E-12          | 1.64E-12  |
| y1999                       | 1.18E-12           | 1.18E-12  | 1.06E-12          | 1.06E-12  | 1.54E-12        | 1.54E-12  | 1.36E-12          | 1.36E-12  |
| y2000                       | -5.33E-12          | -5.33E-12 | -3.00E-12         | -3.00E-12 | -6.04E-12       | -6.01E-12 | -3.44E-12         | -3.46E-12 |
| y2001                       | -1.11E-12          | -1.10E-12 | -1.78E-13         | -1.77E-13 | -1.60E-12       | -1.59E-12 | -2.10E-13         | -2.14E-13 |
| y2002                       | 1.48E-12           | 1.48E-12  | 1.28E-12          | 1.28E-12  | 2.07E-12        | 2.08E-12  | 1.75E-12          | 1.75E-12  |
| y2003                       | 3.90E-12           | 3.90E-12  | 4.53E-12          | 4.52E-12  | 4.86E-12        | 4.85E-12  | 5.31E-12          | 5.32E-12  |
| y2004                       | 1.02E-12           | 1.02E-12  | 9.40E-13          | 9.42E-13  | 1.21E-12        | 1.21E-12  | 1.14E-12          | 1.14E-12  |
| Intercept                   | 2.12E-12           | 2.12E-12  | 1.90E-12          | 1.90E-12  | 2.56E-12        | 2.57E-12  | 2.27E-12          | 2.27E-12  |

+ Relative difference=(coefficient in 8 or 16 quadrature points- original coefficient)/ original coefficients

† In 12 quadrature points

Effect of Critical Access Hospital Conversion on Patient Safety: Appendix

Table S14. Quadchk Results for PSI-7:

Relative Difference<sup>+</sup> of Coefficients in 8 or 16 Quadrature Points Compared with Original Coefficients<sup>†</sup>

|                             | Risk-adjusted rate |           |                   |           | Observed rate   |           |                   |           |
|-----------------------------|--------------------|-----------|-------------------|-----------|-----------------|-----------|-------------------|-----------|
|                             | Model using CAH    |           | Model using CAHmv |           | Model using CAH |           | Model using CAHmv |           |
|                             | 8 points           | 16 points | 8 points          | 16 points | 8 points        | 16 points | 8 points          | 16 points |
| Log Likelihood              | 3.04E-13           | 3.03E-13  | 3.51E-13          | 3.51E-13  | 1.07E-13        | 1.07E-13  | 1.27E-13          | 1.26E-13  |
| CAH/CAHmv                   | 3.15E-12           | 3.14E-12  | 4.07E-12          | 4.06E-12  | 1.21E-12        | 1.18E-12  | 1.58E-12          | 1.56E-12  |
| % Medicare days             | 2.52E-12           | 2.46E-12  | 3.08E-12          | 3.03E-12  | 1.17E-12        | 9.86E-13  | 1.37E-12          | 1.23E-12  |
| % Medicaid days             | 3.12E-12           | 3.09E-12  | 3.51E-12          | 3.49E-12  | 1.21E-12        | 1.14E-12  | 1.35E-12          | 1.29E-12  |
| % of surgical discharges    | 4.89E-12           | 5.58E-12  | 6.11E-12          | 7.01E-12  | 3.62E-13        | 1.24E-12  | 3.53E-13          | 1.29E-12  |
| Charlson Index              | 2.22E-12           | 2.20E-12  | 2.69E-12          | 2.68E-12  | 7.87E-13        | 7.23E-13  | 9.41E-13          | 8.94E-13  |
| Market concentration (HHI)  | 1.49E-11           | 1.45E-11  | 1.54E-11          | 1.52E-11  | -3.48E-12       | -3.20E-12 | -4.61E-12         | -4.57E-12 |
| Per capita income (\$1,000) | 2.48E-12           | 2.39E-12  | 2.86E-12          | 2.79E-12  | 1.15E-12        | 9.08E-13  | 1.28E-12          | 1.07E-12  |
| Population density          | 9.68E-12           | 1.02E-11  | 1.07E-11          | 1.11E-11  | 1.81E-12        | 2.85E-12  | 2.25E-12          | 3.21E-12  |
| y1998                       | 1.79E-12           | 1.79E-12  | 2.04E-12          | 2.04E-12  | 6.87E-13        | 6.71E-13  | 7.82E-13          | 7.76E-13  |
| y1999                       | 2.07E-12           | 2.03E-12  | 2.40E-12          | 2.37E-12  | 9.15E-13        | 8.15E-13  | 1.04E-12          | 9.59E-13  |
| y2000                       | 2.15E-12           | 2.11E-12  | 2.45E-12          | 2.43E-12  | 8.80E-13        | 7.90E-13  | 9.89E-13          | 9.18E-13  |
| y2001                       | 3.62E-12           | 3.73E-12  | 7.02E-12          | 7.25E-12  | 1.05E-12        | 1.30E-12  | 1.83E-12          | 2.37E-12  |
| y2002                       | 1.99E-12           | 1.96E-12  | 2.15E-12          | 2.13E-12  | 8.07E-13        | 7.22E-13  | 8.56E-13          | 7.92E-13  |
| y2003                       | 1.74E-13           | -1.88E-14 | -2.05E-12         | -2.28E-12 | 4.50E-13        | -1.30E-14 | -2.37E-13         | -8.13E-13 |
| y2004                       | 2.29E-12           | 2.25E-12  | 2.67E-12          | 2.64E-12  | 9.48E-13        | 8.47E-13  | 1.09E-12          | 1.00E-12  |
| Intercept                   | 3.12E-12           | 3.11E-12  | 3.58E-12          | 3.58E-12  | 1.14E-12        | 1.10E-12  | 1.30E-12          | 1.27E-12  |

+ Relative difference=(coefficient in 8 or 16 quadrature points- original coefficient)/ original coefficients

† In 12 quadrature points

Effect of Critical Access Hospital Conversion on Patient Safety: Appendix

Table S15. Quadchk Results for PSI-15 (Original models in the paper and Model 1 in sensitivity analyses):  
Relative Difference<sup>+</sup> of Coefficients in 8 or 16 Quadrature Points Compared with Original Coefficients<sup>†</sup>

|                             | Risk-adjusted rate |           |                   |           | Observed rate   |           |                   |           |
|-----------------------------|--------------------|-----------|-------------------|-----------|-----------------|-----------|-------------------|-----------|
|                             | Model using CAH    |           | Model using CAHmv |           | Model using CAH |           | Model using CAHmv |           |
|                             | 8 points           | 16 points | 8 points          | 16 points | 8 points        | 16 points | 8 points          | 16 points |
| Log Likelihood              | -7.8E-05           | 8.80E-06  | -7E-05            | 8.83E-06  | -0.00015        | 1.57E-06  | -0.00016          | 2.96E-06  |
| CAH/CAHmv                   | -0.01081           | 0.000368  | -0.01245          | 0.000442  | 0.004131        | 0.001484  | -0.0004           | 0.001756  |
| % Medicare days             | 0.012553           | -9.6E-05  | 0.012234          | -0.00017  | 0.009795        | 0.005262  | 0.012001          | 0.005243  |
| % Medicaid days             | -0.02271           | 0.000534  | -0.02423          | 0.000607  | -0.00117        | -0.00619  | -0.0041           | -0.00665  |
| % of surgical discharges    | -0.00834           | 0.001298  | -0.00758          | 0.001221  | 0.009722        | -0.00123  | 0.009438          | -0.00103  |
| Charlson Index              | 0.005202           | -2.9E-05  | 0.005368          | -6.1E-05  | 0.01657         | -0.0027   | 0.017157          | -0.00293  |
| Market concentration (HHI)  | -0.458             | 0.028565  | -0.34346          | 0.019577  | 0.024935        | -0.20765  | 0.068421          | -0.23852  |
| Per capita income (\$1,000) | -0.03276           | 0.002455  | -0.03111          | 0.002359  | -0.00713        | -0.00741  | 0.004505          | -0.00695  |
| Population density          | -0.14642           | 0.016255  | -0.15653          | 0.017312  | -0.01731        | 0.004451  | -0.01947          | 0.004187  |
| y1998                       | 0.004247           | -0.0002   | 0.003508          | -0.00015  | -0.0068         | 0.00296   | -0.0072           | 0.002946  |
| y1999                       | -0.00097           | 2.81E-05  | -0.00102          | 2.84E-05  | 0.005491        | -0.00174  | 0.006395          | -0.00169  |
| y2000                       | 0.003225           | -6E-05    | 0.004173          | -8.8E-05  | 0.00988         | -0.00279  | 0.012257          | -0.00311  |
| y2001                       | -0.00599           | 0.000396  | -0.00577          | 0.000431  | 0.012194        | -0.00126  | 0.014081          | -0.00135  |
| y2002                       | -0.00448           | 0.000633  | -0.00347          | 0.00051   | -0.00798        | 0.001821  | -0.00697          | 0.001706  |
| y2003                       | -0.00873           | 0.001157  | -0.00335          | 0.000895  | -0.02122        | 0.00451   | -0.02262          | 0.004834  |
| y2004                       | -0.00316           | 0.000449  | -0.00117          | 0.000381  | -0.00797        | 0.001603  | -0.00697          | 0.001447  |
| Intercept                   | -0.02498           | 0.001699  | -0.0238           | 0.00158   | 0.012083        | 0.001417  | 0.009111          | 0.001196  |

+ Relative difference=(coefficient in 8 or 16 quadrature points- original coefficient)/ original coefficients

† In 12 quadrature points

Effect of Critical Access Hospital Conversion on Patient Safety: Appendix

Table S16. Quadchk Results for Composite score of 4PSIs:

Relative Difference<sup>+</sup> of Coefficients in 8 or 16 Quadrature Points Compared with Original Coefficients<sup>†</sup>

|                             | Risk-adjusted rate |           |                   |           | Observed rate   |           |                   |           |
|-----------------------------|--------------------|-----------|-------------------|-----------|-----------------|-----------|-------------------|-----------|
|                             | Model using CAH    |           | Model using CAHmv |           | Model using CAH |           | Model using CAHmv |           |
|                             | 8 points           | 16 points | 8 points          | 16 points | 8 points        | 16 points | 8 points          | 16 points |
| Log Likelihood              | -5.4E-05           | 2.52E-06  | -5.7E-05          | 3.13E-06  | -6.3E-05        | -2.8E-05  | -7.1E-05          | -2.7E-05  |
| CAH/CAHmv                   | 0.000647           | -1.7E-05  | -0.00242          | 0.000274  | 0.008686        | 0.000382  | 0.003983          | 0.000579  |
| % Medicare days             | 0.00722            | -0.00167  | 0.00752           | -0.00217  | 0.045267        | -0.00056  | 0.049628          | -0.0013   |
| % Medicaid days             | -0.01429           | -0.00086  | -0.01599          | -0.00072  | -0.01667        | -0.01295  | -0.02093          | -0.01437  |
| % of surgical discharges    | -0.00083           | 0.000515  | 0.00075           | 0.000466  | -0.01333        | -0.00484  | -0.01533          | -0.00526  |
| Charlson Index              | 0.004247           | -0.00133  | 0.004762          | -0.00157  | 0.001023        | -0.00549  | 0.000687          | -0.00668  |
| Market concentration (HHI)  | -0.67387           | 0.022397  | -0.50062          | 0.014781  | -0.17514        | 0.003343  | -0.15522          | 0.014088  |
| Per capita income (\$1,000) | -0.01712           | 0.001103  | -0.01526          | 0.001277  | 0.107578        | -0.0495   | 0.134574          | -0.0353   |
| Population density          | -0.2652            | 0.039644  | -0.26635          | 0.038001  | 0.06542         | 0.002505  | 0.071235          | 0.001773  |
| y1998                       | 0.003005           | 0.000578  | 0.004884          | 0.000576  | 0.000737        | 0.00225   | 0.000401          | 0.00226   |
| y1999                       | -0.00038           | -0.00013  | -0.00051          | -0.00014  | 0.003007        | -0.01396  | 0.004389          | -0.01481  |
| y2000                       | 0.003581           | -0.00032  | 0.003784          | -0.00046  | -0.06676        | -1.16302  | 0.007773          | 0.083439  |
| y2001                       | 0.000442           | 0.000131  | -0.00055          | 0.000318  | 0.001379        | -0.013    | -0.00795          | -0.0201   |
| y2002                       | -0.00459           | 0.00024   | -0.0021           | 7.59E-05  | -0.00807        | 0.002055  | -0.0065           | 0.001905  |
| y2003                       | -0.00792           | -0.00047  | 0.004586          | -0.00155  | -0.00184        | 0.005651  | 0.001892          | 0.005831  |
| y2004                       | -0.002             | -6.6E-05  | -0.00014          | -0.00023  | -0.00438        | 0.001474  | -0.00292          | 0.00128   |
| Intercept                   | -0.02341           | 0.001222  | -0.02216          | 0.001258  | -0.02264        | -0.00414  | -0.03415          | -0.00659  |

+ Relative difference=(coefficient in 8 or 16 quadrature points- original coefficient)/ original coefficients

† In 12 quadrature points

Effect of Critical Access Hospital Conversion on Patient Safety: Appendix

Table S17. Quadchk Results for Composite score of 6PSIs:

Relative Difference<sup>+</sup> of Coefficients in 8 or 16 Quadrature Points Compared with Original Coefficients<sup>†</sup>

|                             | Risk-adjusted rate |           |                   |           | Observed rate   |           |                   |           |
|-----------------------------|--------------------|-----------|-------------------|-----------|-----------------|-----------|-------------------|-----------|
|                             | Model using CAH    |           | Model using CAHmv |           | Model using CAH |           | Model using CAHmv |           |
|                             | 8 points           | 16 points | 8 points          | 16 points | 8 points        | 16 points | 8 points          | 16 points |
| Log Likelihood              | -5.7E-05           | 4.54E-05  | -6.1E-05          | 4.42E-05  | 0.000103        | 1.48E-05  | 8.36E-05          | 1.7E-05   |
| CAH/CAHmv                   | -0.0125            | -0.00205  | 0.008201          | -0.00334  | -0.06481        | 0.006112  | -0.01772          | 0.002049  |
| % Medicare days             | 0.075761           | -0.00099  | 0.104428          | 0.003277  | 0.038014        | 0.00191   | 0.11779           | -0.0055   |
| % Medicaid days             | 0.020506           | -0.00131  | 0.019134          | -0.00149  | 0.036787        | -0.00775  | 0.041083          | -0.00932  |
| % of surgical discharges    | 0.083496           | -0.01195  | 0.060963          | -0.0044   | 0.112498        | -0.02479  | 0.139682          | -0.02971  |
| Charlson Index              | -0.00635           | -0.00577  | -0.00953          | -0.00314  | -0.00279        | -0.00253  | 0.004413          | -0.0027   |
| Market concentration (HHI)  | -0.01351           | 0.017289  | 0.076128          | 0.022211  | -0.08894        | 0.029444  | -0.05503          | 0.030123  |
| Per capita income (\$1,000) | 0.003413           | 0.003768  | 0.003495          | 0.003334  | -0.01895        | 0.001178  | -0.02012          | 0.000388  |
| Population density          | -0.20242           | 0.045405  | -0.18239          | 0.049764  | -0.34128        | 0.048581  | -0.28121          | 0.049895  |
| y1998                       | 0.002474           | -0.00232  | 0.000611          | -0.00216  | 0.008921        | -0.00174  | 0.008949          | -0.00147  |
| y1999                       | 0.004923           | -0.00185  | 0.004268          | -0.00174  | 0.00911         | -0.00174  | 0.008597          | -0.00167  |
| y2000                       | 0.018574           | -0.01101  | 0.007707          | -0.00772  | 0.03421         | -0.007    | 0.033777          | -0.00639  |
| y2001                       | 0.010179           | -0.00209  | 0.008862          | -0.00187  | 0.019187        | -0.00339  | 0.01559           | -0.00289  |
| y2002                       | -0.01405           | -0.01425  | 0.00825           | -0.00921  | -0.02668        | 0.007352  | 0.069683          | -0.00828  |
| y2003                       | -0.00234           | 0.619844  | 0.023007          | -0.01407  | -0.05576        | 0.011865  | 0.048211          | -0.00644  |
| y2004                       | -0.00715           | -0.00755  | 0.007133          | -0.00544  | 0.00693         | -0.00266  | 0.004246          | -0.00067  |
| Intercept                   | 0.03209            | -0.00543  | 0.012437          | -0.00546  | 0.039203        | -0.01522  | 0.034764          | -0.01868  |

+ Relative difference=(coefficient in 8 or 16 quadrature points- original coefficient)/ original coefficients

† In 12 quadrature points
